# Supplementary material
Source: Springer Nature journal article supplement (https://www.springermedizin.de/resource/supplementary/12885_2014_5159_MOESM1_ESM.pdf/9468590)
Supplement: MOESM1 [file 9468590]

Age  $\geq$  50 years  
KPS  $\geq$  50%  
informed consent

**First visit**  
Physical Exam  
LENT-SOMA  
Medication

## Maximum safe resection

Histologically confirmed GBM (frozen section)

IORT not  
feasible

IORT  
feasible

**IORT**  
**20 - 40 Gy**

**Pre-EBRT**  
Physical Exam  
LENT-SOMA  
Medication

early MRI (24-48h)

## Chemo-Radiotherapy

EBRT (30 x 2 Gy)  
+ 50 mg/m<sup>2</sup>/d temozolomide

**post-EBRT**  
Physical Exam  
LENT-SOMA  
Medication

## adjuvant Chemotherapy

6 cycles 150-200 mg/m<sup>2</sup>/d/cycle temozolomide

**FU**  
Physical Exam  
LENT-SOMA  
Medication

## Follow-up MRIs

every 3 months

Early DLT (3 weeks)

Early-delayed DLT (3 months)
